# Supplementary material
Source: Springer Nature journal article supplement (https://www.springermedizin.de/resource/supplementary/12885_2007_940_MOESM5_ESM.pdf/9471200)

# Additional File 5

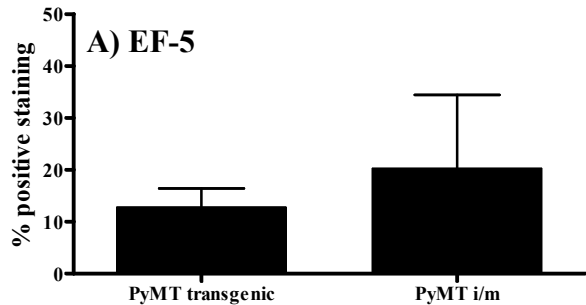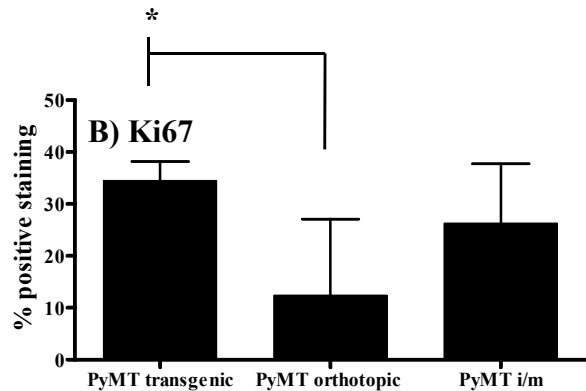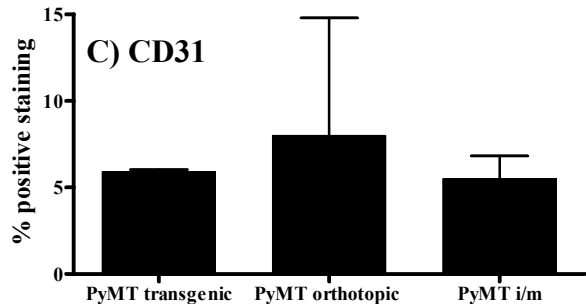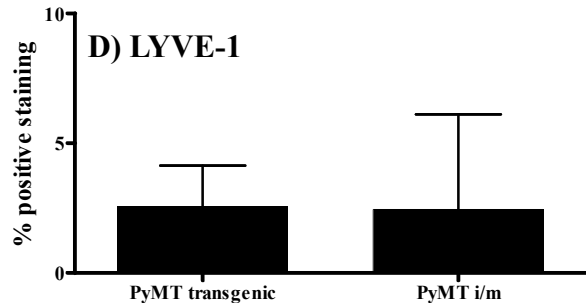

Supplement: MOESM5 [file 9471200]
